# Supplementary material for: hacksig: a unified and tidy R framework to easily compute gene expression signature scores
Source: PubMed Central journal article supplement (PMC9113261; doi:10.1093/bioinformatics/btac161), 2022-03-18
Supplement: btac161_supplementary_data.pdf [file btac161_supplementary_data.pdf]

# hacksig: a unified and tidy R framework to easily compute gene expression signature scores

Supplementary materials

Carenzo, A., Pistore, F., Serafini, M.S., Lenoci, D., Licata A.G., De Cecco, L.

2022-02-24

## Contents

|                                   |           |
|-----------------------------------|-----------|
| <b>Package design motivations</b> | <b>1</b>  |
| <b>Implemented signatures</b>     | <b>2</b>  |
| <b>Comparison</b>                 | <b>2</b>  |
| Performance . . . . .             | 4         |
| Output . . . . .                  | 4         |
| <b>Reproducible code</b>          | <b>5</b>  |
| Session info . . . . .            | 9         |
| <b>References</b>                 | <b>12</b> |

## Package design motivations

Main motivations which lead us to rewrite from scratch the **three** single sample methods implementations (i.e. **combined z-score**, **single sample GSEA** and **singscore**) in **hacksig** are the following:

1. to keep as low as possible the number of package dependencies, favoring a **tidyverse** integration (Wickham et al. 2019);
2. to implement additional options for the single sample GSEA procedure (not present in the **GSEA** package), such as rank normalization as in the **GenePattern** module (see [github.com/GSEA-MSigDB/ssGSEA-gpmodule](https://github.com/GSEA-MSigDB/ssGSEA-gpmodule) and the help page of the `hack_sig()` function) and a sample-wise score normalization in  $[0, 1]$  (see `sample_norm = "separate"` in `hack_sig()`);
3. to create a unified and tidy interface for these methods.

An important consequence from point 1 is that common Bioconductor classes, such as **SummarizedExperiment**, **ExpressionSet** or **GeneSetCollection**, are not supported (at the moment) (Huber et al. 2015). Hence, inputs to **hacksig** functions are simple base R objects: matrices or data frames for expression data sets and lists for gene sets. Nonetheless, if a consistent number of **hacksig** users will require a tighter integration with the Bioconductor ecosystem, we will surely consider this for future developments of the package.

## Implemented signatures

Table S1 lists all the 23 cancer transcriptomics signatures implemented in `hacksig` as of February 2022. The *Primary category* column shows that most (17/23) of the signatures are immune-related. The *Type of tumor* column shows for which types of cancer a signature was developed.

In order to give a unique name to each signature, we adopted the following convention:

- **first author** name of the original publication;
- **year** of publication;
- underscore followed by a **keyword**.

Exceptions are signatures for the CINSARC, ESTIMATE and Immunophenoscore methods (Chibon et al. 2010; Yoshihara et al. 2013; Charoentong et al. 2017).

All functions in `hacksig` get gene-level information (e.g. gene symbols, model weights) about the implemented signatures from a hidden object called `signatures_data`:

```
hacksig::signatures_data

## # A tibble: 878 x 8
##   signature_id signature_keywords      gene_symbol gene_entrez_id gene_weight
##   <chr>         <chr>                <chr>         <chr>          <dbl>
## 1 muro2016_ifng muro2016_ifng|ifng|inte~ CXCL9         4283          NA
## 2 muro2016_ifng muro2016_ifng|ifng|inte~ CXCL10        3627          NA
## 3 muro2016_ifng muro2016_ifng|ifng|inte~ IDO1          3620          NA
## 4 muro2016_ifng muro2016_ifng|ifng|inte~ IFNG          3458          NA
## 5 muro2016_ifng muro2016_ifng|ifng|inte~ HLA-DRA       3122          NA
## 6 muro2016_ifng muro2016_ifng|ifng|inte~ STAT1         6772          NA
## 7 fang2021_irgs fang2021_irgs|immune    DEFB1         1672         -0.319
## 8 fang2021_irgs fang2021_irgs|immune    EDNRB         1910         -0.418
## 9 fang2021_irgs fang2021_irgs|immune    ADM           133           0.245
## 10 fang2021_irgs fang2021_irgs|immune    BTC           685           0.710
## # ... with 868 more rows, and 3 more variables: signature_method <chr>,
## #   publication_doi <chr>, description <chr>
```

This object contains also the **keywords** used to obtain enrichment scores just for particular types of signatures (e.g. `signatures = "immune"` in `hack_sig()`) and the score computation **method** used in the original publication (e.g. average gene expression, weighted sum between gene expression values and model coefficients).

The `signatures_data` R object will be updated whenever new signatures will be added to `hacksig`.

## Comparison

Now, we will compare single sample methods implemented in our package with those in `GSVA` and `singscore` (Hänzelmann et al. 2013; Foroutan et al. 2018). We will show differences in performance (i.e. computation time) and type of output by considering a toy gene expression matrix (randomly generated gene expression values for 20000 genes and 20 samples) included in `hacksig` and the 50 Hallmark gene sets (Liberzon et al. 2015).

Table S1: Cancer transcriptomics gene signatures implemented in hacksig.

| Signature ID              | Primary category      | Typers of tumor   | Description                                                                                                                            | Reference                    |
|---------------------------|-----------------------|-------------------|----------------------------------------------------------------------------------------------------------------------------------------|------------------------------|
| estimate_immune           | Immune                | Solid cancers     | Immune-related genes based on ESTIMATE (Estimation of STromal and Immune cells in MAlignant Tumours using Expression data).            | Yoshihara et al. (2013)      |
| estimate_stromal          | Immune                | Solid cancers     | Stroma-related genes based on ESTIMATE (Estimation of STromal and Immune cells in MAlignant Tumours using Expression data).            | Yoshihara et al. (2013)      |
| rooney2015_cyt            | Immune                | Solid cancers     | Genes giving a measure of immune cytolytic activity in tumors.                                                                         | Rooney et al. (2015)         |
| ips_cp                    | Immune                | Solid cancers     | Co-inhibitory and co-stimulatory biomarkers based on Immunophenoscore.                                                                 | Charoentong et al. (2017)    |
| ips_ec                    | Immune                | Solid cancers     | Infiltration of activated CD8+/CD4+ T cells and Tem CD8+/CD4+ cells based on Immunophenoscore.                                         | Charoentong et al. (2017)    |
| ips_mhc                   | Immune                | Solid cancers     | MHC class I/II and non-classical biomarkers based on Immunophenoscore.                                                                 | Charoentong et al. (2017)    |
| ips_sc                    | Immune                | Solid cancers     | Infiltration of immunosuppressive cells (Tregs and MDSCs) based on Immunophenoscore.                                                   | Charoentong et al. (2017)    |
| muro2016_ifng             | Immune                | Melanoma          | Interferon gamma-related genes found to be significantly associated with clinical response to pembrolizumab in patients with melanoma. | Muro et al. (2016)           |
| ayers2017_immexp          | Immune                | Solid cancers     | Immune expanded gene signature predicting response to pembrolizumab in multiple cancer types.                                          | Ayers et al. (2017)          |
| bai2019_immune            | Immune                | HNSCC-oral cavity | Immune/inflammatory-related prognostic genes.                                                                                          | Bai et al. (2019)            |
| she2020_irgs              | Immune                | HNSCC             | Prognostic signature of immune-related genes.                                                                                          | She et al. (2020)            |
| liu2020_immune            | Immune                | HNSCC             | Immune-related genes associated to overall survival.                                                                                   | Liu et al. (2020)            |
| liu2021_mgs               | Immune                | HNSCC             | Prognostic signature of myeloid-related genes.                                                                                         | Liu et al. (2021)            |
| li2021_irgs               | Immune                | Thyroid cancer    | Immune-related genes associated to dedifferentiation and immune exhaustion.                                                            | Li et al. (2021)             |
| qiang2021_irgs            | Immune                | HNSCC             | Prognostic signature of immune-related genes.                                                                                          | Qiang et al. (2021)          |
| fang2021_irgs             | Immune                | HNSCC             | Immune-related genes for survival prediction.                                                                                          | Fang et al. (2021)           |
| eschrich2009_rsi          | Prognostic/Predictive | Solid cancers     | Genes aimed at predicting radiosensitivity. A higher index correspond to a more radioresistant patient.                                | Eschrich et al. (2009)       |
| cinsarc                   | Prognostic/Predictive | Sarcoma           | Signature (Complexity INdex in SARComas) aimed at identifying high-risk soft-tissue sarcomas and predicting metastasis outcome.        | Chibon et al. (2010)         |
| eustace2013_hypoxia       | Prognostic/Predictive | HNSCC-larynx      | Hypoxia-related genes aimed at predicting benefit from hypoxia-modifying treatment.                                                    | Eustace et al. (2013)        |
| lohavanichbutr2013_hpvneg | Prognostic/Predictive | HNSCC-oral cavity | Signature prognostic of HPV-negative oral squamous cell carcinoma.                                                                     | Lohavanichbutr et al. (2013) |
| dececco2014_int172        | Prognostic/Predictive | HNSCC             | Signature aimed at stratifying HNSCC patients in high/low risk of relapse.                                                             | De Cecco et al. (2014)       |
| wu2020_metabolic          | Prognostic/Predictive | HNSCC             | Metabolic prognostic signature.                                                                                                        | Wu et al. (2020)             |
| hu2021_derbp              | Prognostic/Predictive | HNSCC             | Prognostic signature of genes related to RNA-binding proteins.                                                                         | Hu et al. (2021)             |

## Performance

Every benchmark will be run on a single core even if all three packages support parallel computation. The `bench` package (Hester and Vaughan 2021) will be used to run the functions 50 times each and compare the results for the *combined z-score*, *raw single sample GSEA* (ssGSEA) and *undirected singscore* methods. Benchmark results for the *normalized ssGSEA* and *up-regulated singscore* procedures will not be shown, being these similar in performance to the raw ssGSEA and undirected singscore respectively.

From Figure S1, the ssGSEA and singscore implementations in the `GSVA` and `singscore` packages respectively appear to be undoubtedly faster than those in `hacksig`.

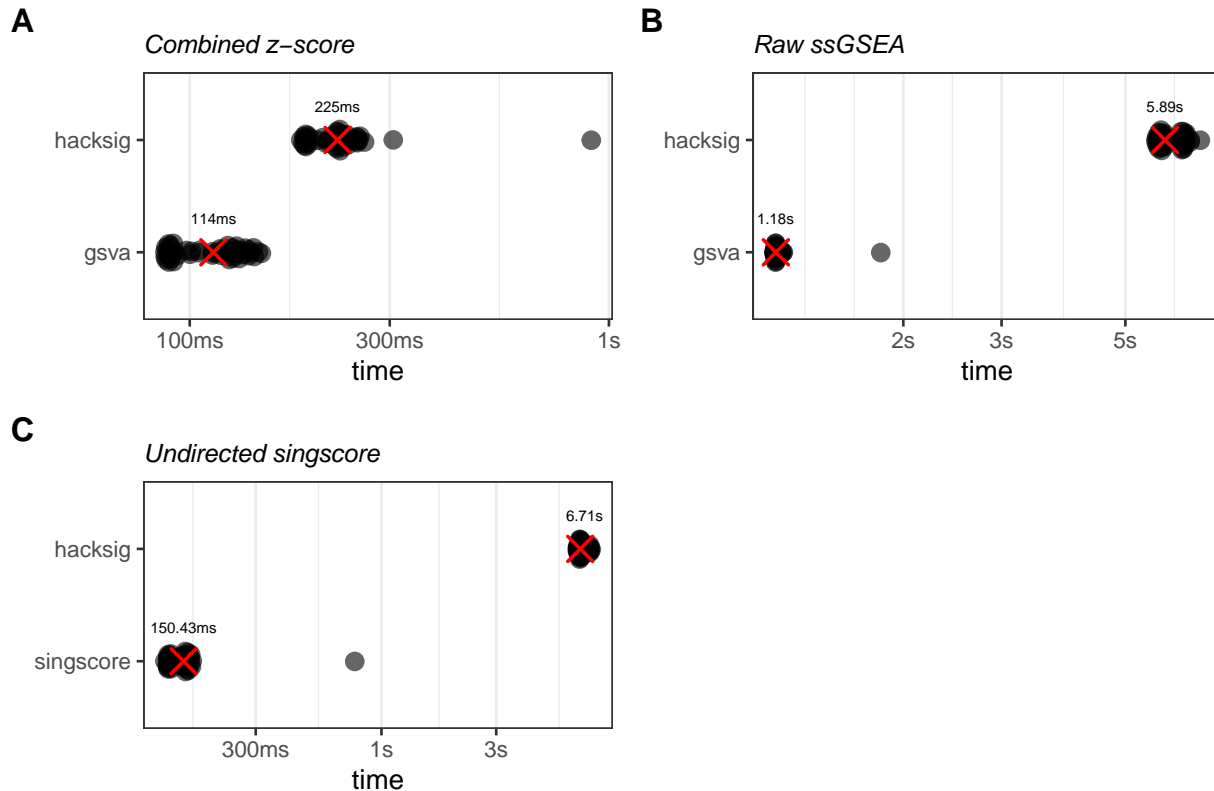

Figure S1: Benchmark times for `hacksig` versus `GSVA`/`singscore` implementations of combined z-score (A), raw ssGSEA (B) and undirected singscore (C). Red crosses show median times.

## Output

Every dot in Figure S2 represents an enrichment score for the 50 Hallmark gene sets in 20 samples, computed both with `hacksig` and `GSVA`/`singscore`. Dots lay on the  $y = x$  line and hence output from the `hack_sig()` function is equal to the corresponding `GSVA` and `singscore` counterparts.

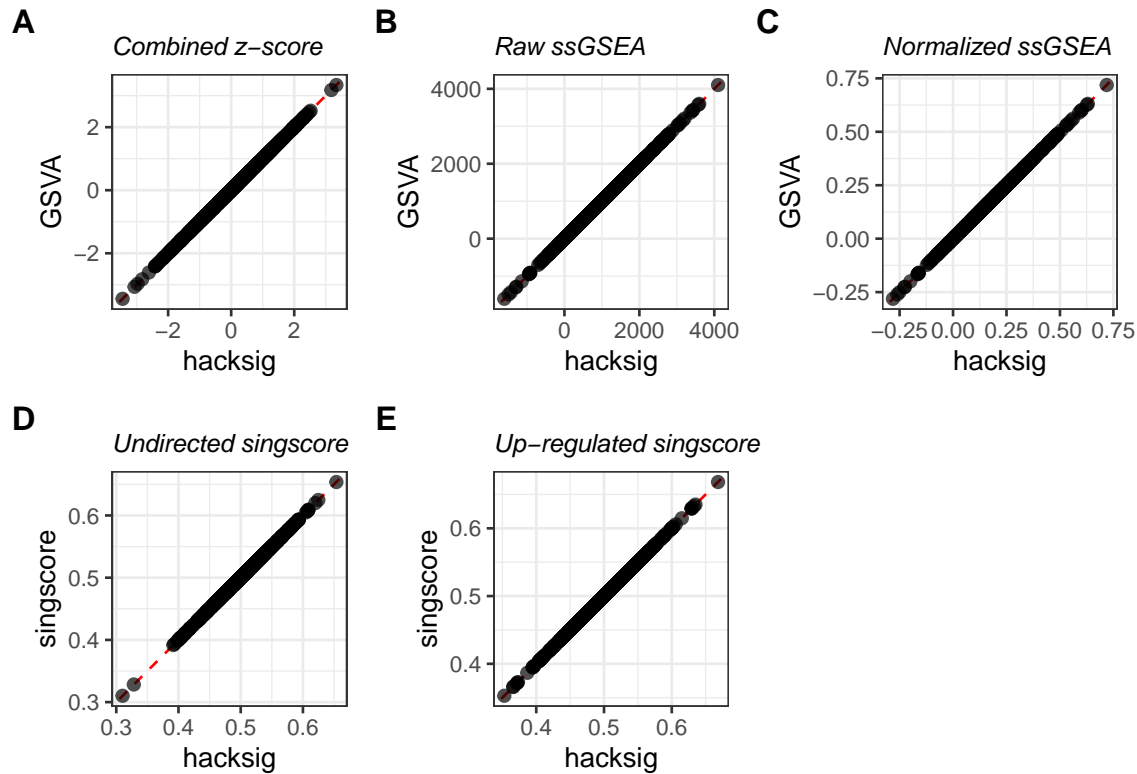

Figure S2: Enrichment scores comparison between *hacksig* and *GSVA*/*singscore*. Each panel shows enrichment scores computed with *hacksig* (x-axis) and *GSVA* or *singscore* (y-axis) for 5 different procedures: combined z-score (A), raw ssGSEA (B), normalized ssGSEA (C), undirected singscore (D), up-regulated singscore (E).

## Reproducible code

This supplementary document was produced with *rmarkdown* (Xie et al. 2018). It is possible to reproduce output and figures above by running the R code reported in this section.

```
library(hacksig)
library(GSVA)
library(singscore)
library(dplyr)
library(ggplot2)
library(patchwork)

theme_set(theme_bw())
theme_update(panel.grid.major.y = element_blank())

# Store the Hallmark gene sets as a list of gene symbols
hallmark_list <- msigdb::msigdb(species = "Homo sapiens", category = "H") %>%
  distinct(gs_name, gene_symbol) %>%
  tidyr::nest(genes = c(gene_symbol)) %>%
  mutate(genes = purrr::map(genes,
                            purrr::compose(purrr::as_vector, unname))) %>%
  tibble::deframe()

# Benchmarks of hacksig versus GSVA/singscore
```

```

res_zscore <- bench::mark(
  hacksig = hack_sig(expr_data = test_expr,
                    signatures = hallmark_list,
                    method = "zscore"),
  gsva = gsva(expr = test_expr, gset.idx.list = hallmark_list,
             method = "zscore", verbose = FALSE),
  iterations = 50, filter_gc = TRUE, check = FALSE
)

res_ssgsea <- bench::mark(
  hacksig = hack_sig(expr_data = test_expr,
                    signatures = hallmark_list,
                    method = "ssgsea", sample_norm = "raw"),
  gsva = gsva(expr = test_expr, gset.idx.list = hallmark_list,
             method = "ssgsea", ssgsea.norm = FALSE,
             verbose = FALSE),
  iterations = 50, filter_gc = TRUE, check = FALSE
)

ranked_expr <- rankGenes(test_expr, tiesMethod = "average")

hallmark_gsc <- purrr::pmap(
  list(hallmark_list,
       setName = as.list(names(hallmark_list))),
  GSEABase::GeneSet
)

res_singscore <- bench::mark(
  hacksig = hack_sig(expr_data = test_expr,
                    signatures = hallmark_list,
                    method = "singscore", direction = "none"),
  singscore = multiScore(rankData = ranked_expr,
                       upSetColc = hallmark_gsc,
                       knownDirection = FALSE),
  iterations = 50, filter_gc = TRUE, check = FALSE
)

# Auxiliary function to plot benchmark results
plot_bench <- function(results, title, rev = FALSE) {
  p <- autoplot(results, color = "black",
               type = "beeswarm",
               alpha = 0.6, size = 3, width = 0.1) +
  stat_summary(fun = median,
              color = "red", shape = 4, size = 1) +
  geom_text(aes(expression, time, label = median),
           data = results %>%
             mutate(time = gsub("m|s", "", median) %>%
                   as.numeric() %>%
                   ifelse(. > 100, . / 1000, .)),
           expression = as.character(expression),
           median = as.character(median)),
           size = 2,
           nudge_x = 0.3, nudge_y = 0,

```

```

        inherit.aes = FALSE) +
      labs(x = NULL, title = title)
    if (rev == TRUE) {
      p <- p + scale_x_discrete(limits = c("singscore", "hacksig"))
    }
  p
}

# Figure S1
fig1a <- plot_bench(res_zscore, "Combined z-score")
fig1b <- plot_bench(res_ssgsea, "Raw ssGSEA")
fig1c <- plot_bench(res_singscore, "Undirected singscore", TRUE)

fig1a + fig1b + fig1c +
  plot_layout(ncol = 2) +
  plot_annotation(tag_levels = "A",
                  caption = paste("Figure S1: Benchmark times for hacksig versus GSVA/singscore implemen
                                "raw ssGSEA (B) and undirected singscore (C). Red crosses show medi
                                sep = "\n")) &
  theme(plot.title = element_text(size = 10, face = "italic"),
        plot.tag = element_text(face = "bold"))

# Compute scores with different methods in hacksig and GSVA/singscore
## Combined z-score
z_hacksig <- hack_sig(expr_data = test_expr, signatures = hallmark_list,
                     method = "zscore") %>%
  tidyr::pivot_longer(-sample_id,
                      names_to = "sig", values_to = "hacksig_score")

z_gsva <- gsva(expr = test_expr, gset.idx.list = hallmark_list,
              method = "zscore", verbose = FALSE) %>%
  t() %>%
  tibble::as_tibble(rownames = "sample_id") %>%
  tidyr::pivot_longer(-sample_id,
                      names_to = "sig", values_to = "other_score")

## Raw ssGSEA
ssgraw_hacksig <- hack_sig(expr_data = test_expr, signatures = hallmark_list,
                          method = "ssgsea", sample_norm = "raw") %>%
  tidyr::pivot_longer(-sample_id,
                      names_to = "sig", values_to = "hacksig_score")

ssgraw_gsva <- gsva(expr = test_expr, gset.idx.list = hallmark_list,
                   method = "ssgsea", ssgsea.norm = FALSE,
                   verbose = FALSE) %>%
  t() %>%
  tibble::as_tibble(rownames = "sample_id") %>%
  tidyr::pivot_longer(-sample_id,
                      names_to = "sig", values_to = "other_score")

## Normalized ssGSEA
ssgnorm_hacksig <- hack_sig(expr_data = test_expr, signatures = hallmark_list,
                           method = "ssgsea", sample_norm = "all") %>%
  tidyr::pivot_longer(-sample_id,
                      names_to = "sig", values_to = "hacksig_score")

```

```

ssgnorm_gsva <- gsva(expr = test_expr, gset.idx.list = hallmark_list,
                    method = "ssgsea", ssgsea.norm = TRUE,
                    verbose = FALSE) %>%

t() %>%
tibble::as_tibble(rownames = "sample_id") %>%
tidyr::pivot_longer(-sample_id,
                    names_to = "sig", values_to = "other_score")

## Undirected singscore
singun_hacksig <- hack_sig(expr_data = test_expr, signatures = hallmark_list,
                          method = "singscore", direction = "none") %>%

tidyr::pivot_longer(-sample_id,
                    names_to = "sig", values_to = "hacksig_score")

singun_singscore <- multiScore(rankData = ranked_expr,
                              upSetColc = hallmark_gsc,
                              knownDirection = FALSE) %>%

purrr::pluck("Scores") %>%
t() %>%
tibble::as_tibble(rownames = "sample_id") %>%
tidyr::pivot_longer(-sample_id,
                    names_to = "sig", values_to = "other_score")

## Up-regulated singscore
singup_hacksig <- hack_sig(expr_data = test_expr, signatures = hallmark_list,
                          method = "singscore", direction = "up") %>%

tidyr::pivot_longer(-sample_id,
                    names_to = "sig", values_to = "hacksig_score")

singup_singscore <- multiScore(rankData = ranked_expr,
                              upSetColc = hallmark_gsc,
                              knownDirection = TRUE, centerScore = FALSE) %>%

purrr::pluck("Scores") %>%
t() %>%
tibble::as_tibble(rownames = "sample_id") %>%
tidyr::pivot_longer(-sample_id,
                    names_to = "sig", values_to = "other_score")

theme_set(theme_bw())
theme_update(plot.caption = element_text(hjust = 0))

# Auxiliary function to plot and compare output from hacksig and GSVA/singscore
compare_pkgs <- function(res_hacksig, res_other, y_label, title) {
  res_hacksig %>%
  left_join(res_other, by = c("sample_id", "sig")) %>%
  ggplot(aes(hacksig_score, other_score)) +
  geom_abline(intercept = 0, slope = 1, linetype = 2, color = "red") +
  geom_point(alpha = 0.7, size = 2) +
  coord_equal() +
  labs(x = "hacksig", y = y_label, title = title)
}

# Figure S2
fig2a <- compare_pkgs(z_hacksig, z_gsva, "GSVA", "Combined z-score")
fig2b <- compare_pkgs(ssgraw_hacksig, ssgraw_gsva, "GSVA", "Raw ssGSEA")

```



```

fig2c <- compare_pkgs(ssgnorm_hacksig, ssgnorm_gsva, "GSVA",
  "Normalized ssGSEA")
fig2d <- compare_pkgs(singun_hacksig, singun_singscore, "singscore",
  "Undirected singscore")
fig2e <- compare_pkgs(singup_hacksig, singup_singscore, "singscore",
  "Up-regulated singscore")

fig2a + fig2b + fig2c +
  fig2d + fig2e +
  plot_layout(ncol = 3) +
  plot_annotation(tag_levels = "A",
    caption = paste("Figure S2: Enrichment scores comparison between hacksig and GSVA/singscore",
      "scores computed with hacksig (x-axis) and GSVA or singscore (y-axis)",
      "z-score (A), raw ssGSEA (B), normalized ssGSEA (C), undirected singscore (D),",
      "up-regulated singscore (E)",
      sep = "\n")) &
  theme(plot.title = element_text(size = 10, face = "italic"),
    plot.tag = element_text(face = "bold"))

```

## Session info

```

## - Session info -----
## setting value
## version R version 4.1.2 (2021-11-01)
## os Ubuntu 20.04.4 LTS
## system x86_64, linux-gnu
## ui X11
## language (EN)
## collate en_US.UTF-8
## ctype en_US.UTF-8
## tz Europe/Rome
## date 2022-02-24
## pandoc 2.17.1.1 @ /usr/lib/rstudio/bin/quarto/bin/ (via rmarkdown)
##
## - Packages -----
## package * version date (UTC) lib source
## annotate 1.72.0 2021-10-26 [1] Bioconductor
## AnnotationDbi 1.56.2 2021-11-09 [1] Bioconductor
## assertthat 0.2.1 2019-03-21 [1] CRAN (R 4.1.2)
## babelgene 21.4 2021-04-26 [1] CRAN (R 4.1.2)
## beachmat 2.10.0 2021-10-26 [1] Bioconductor
## beeswarm 0.4.0 2021-06-01 [1] CRAN (R 4.1.2)
## bench 1.1.2 2021-11-30 [1] CRAN (R 4.1.2)
## Biobase 2.54.0 2021-10-26 [1] Bioconductor
## BiocGenerics 0.40.0 2021-10-26 [1] Bioconductor
## BiocParallel 1.28.3 2021-12-09 [1] Bioconductor
## BiocSingular 1.10.0 2021-10-26 [1] Bioconductor
## Biostrings 2.62.0 2021-10-26 [1] Bioconductor
## bit 4.0.4 2020-08-04 [1] CRAN (R 4.1.2)
## bit64 4.0.5 2020-08-30 [1] CRAN (R 4.1.2)
## bitops 1.0-7 2021-04-24 [1] CRAN (R 4.1.2)
## blob 1.2.2 2021-07-23 [1] CRAN (R 4.1.2)
## cachem 1.0.6 2021-08-19 [1] CRAN (R 4.1.2)

```

```

## cellranger          1.1.0    2016-07-27 [1] CRAN (R 4.1.2)
## cli                 3.2.0    2022-02-14 [1] CRAN (R 4.1.2)
## codetools           0.2-18   2020-11-04 [4] CRAN (R 4.0.3)
## colorspace         2.0-3    2022-02-21 [1] CRAN (R 4.1.2)
## crayon              1.5.0    2022-02-14 [1] CRAN (R 4.1.2)
## DBI                 1.1.2    2021-12-20 [1] CRAN (R 4.1.2)
## DelayedArray        0.20.0   2021-10-26 [1] Bioconductor
## DelayedMatrixStats  1.16.0   2021-10-26 [1] Bioconductor
## digest              0.6.29   2021-12-01 [1] CRAN (R 4.1.2)
## dplyr               * 1.0.8    2022-02-08 [1] CRAN (R 4.1.2)
## edgeR               3.36.0   2021-10-26 [1] Bioconductor
## ellipsis            0.3.2    2021-04-29 [1] CRAN (R 4.1.2)
## evaluate            0.15     2022-02-18 [1] CRAN (R 4.1.2)
## fansi               1.0.2    2022-01-14 [1] CRAN (R 4.1.2)
## farver              2.1.0    2021-02-28 [1] CRAN (R 4.1.2)
## fastmap             1.1.0    2021-01-25 [1] CRAN (R 4.1.2)
## future              1.24.0   2022-02-19 [1] CRAN (R 4.1.2)
## future.apply        1.8.1    2021-08-10 [1] CRAN (R 4.1.2)
## generics            0.1.2    2022-01-31 [1] CRAN (R 4.1.2)
## GenomeInfoDb        1.30.1   2022-01-30 [1] Bioconductor
## GenomeInfoDbData    1.2.7    2021-12-06 [1] Bioconductor
## GenomicRanges       1.46.1   2021-11-18 [1] Bioconductor
## ggbeeswarm          0.6.0    2017-08-07 [1] CRAN (R 4.1.2)
## ggplot2             * 3.3.5    2021-06-25 [1] CRAN (R 4.1.2)
## globals             0.14.0   2020-11-22 [1] CRAN (R 4.1.2)
## glue                1.6.1    2022-01-22 [1] CRAN (R 4.1.2)
## graph              1.72.0   2021-10-26 [1] Bioconductor
## GSEABase            1.56.0   2021-10-26 [1] Bioconductor
## GSVA                * 1.42.0   2021-10-26 [1] Bioconductor
## gtable              0.3.0    2019-03-25 [1] CRAN (R 4.1.2)
## hacksig             * 0.1.2    2022-02-17 [1] CRAN (R 4.1.2)
## HDF5Array           1.22.1   2021-11-14 [1] Bioconductor
## htmltools           0.5.2    2021-08-25 [1] CRAN (R 4.1.2)
## httr                1.4.2    2020-07-20 [1] CRAN (R 4.1.2)
## IRanges             2.28.0   2021-10-26 [1] Bioconductor
## irlba               2.3.5    2021-12-06 [1] CRAN (R 4.1.2)
## kableExtra          1.3.4    2021-02-20 [1] CRAN (R 4.1.2)
## KEGGREST            1.34.0   2021-10-26 [1] Bioconductor
## knitr               1.37     2021-12-16 [1] CRAN (R 4.1.2)
## labeling            0.4.2    2020-10-20 [1] CRAN (R 4.1.2)
## lattice             0.20-45  2021-09-22 [4] CRAN (R 4.1.1)
## lifecycle           1.0.1    2021-09-24 [1] CRAN (R 4.1.2)
## limma               3.50.0   2021-10-26 [1] Bioconductor
## listenv             0.8.0    2019-12-05 [1] CRAN (R 4.1.2)
## locfit              1.5-9.4  2020-03-25 [1] CRAN (R 4.1.2)
## magrittr           2.0.2    2022-01-26 [1] CRAN (R 4.1.2)
## Matrix              1.4-0    2021-12-08 [4] CRAN (R 4.1.2)
## MatrixGenerics      1.6.0    2021-10-26 [1] Bioconductor
## matrixStats         0.61.0   2021-09-17 [1] CRAN (R 4.1.2)
## memoise             2.0.1    2021-11-26 [1] CRAN (R 4.1.2)
## msigdbr             7.4.1    2021-05-05 [1] CRAN (R 4.1.2)
## munsell             0.5.0    2018-06-12 [1] CRAN (R 4.1.2)
## parallelly         1.30.0   2021-12-17 [1] CRAN (R 4.1.2)
## patchwork           * 1.1.1    2020-12-17 [1] CRAN (R 4.1.2)

```

```

## pillar 1.7.0 2022-02-01 [1] CRAN (R 4.1.2)
## pkgconfig 2.0.3 2019-09-22 [1] CRAN (R 4.1.2)
## plyr 1.8.6 2020-03-03 [1] CRAN (R 4.1.2)
## png 0.1-7 2013-12-03 [1] CRAN (R 4.1.2)
## profmem 0.6.0 2020-12-13 [1] CRAN (R 4.1.2)
## purrr 0.3.4 2020-04-17 [1] CRAN (R 4.1.2)
## R6 2.5.1 2021-08-19 [1] CRAN (R 4.1.2)
## Rcpp 1.0.8 2022-01-13 [1] CRAN (R 4.1.2)
## RCurl 1.98-1.6 2022-02-08 [1] CRAN (R 4.1.2)
## readxl 1.3.1 2019-03-13 [1] CRAN (R 4.1.2)
## reshape2 1.4.4 2020-04-09 [1] CRAN (R 4.1.2)
## rhdf5 2.38.0 2021-10-26 [1] Bioconductor
## rhdf5filters 1.6.0 2021-10-26 [1] Bioconductor
## Rhdf5lib 1.16.0 2021-10-26 [1] Bioconductor
## rlang 1.0.1 2022-02-03 [1] CRAN (R 4.1.2)
## rmarkdown 2.11 2021-09-14 [1] CRAN (R 4.1.2)
## RSQLite 2.2.10 2022-02-17 [1] CRAN (R 4.1.2)
## rstudioapi 0.13 2020-11-12 [1] CRAN (R 4.1.2)
## rsvd 1.0.5 2021-04-16 [1] CRAN (R 4.1.2)
## rvest 1.0.2 2021-10-16 [1] CRAN (R 4.1.2)
## S4Vectors 0.32.3 2021-11-21 [1] Bioconductor
## ScaledMatrix 1.2.0 2021-10-26 [1] Bioconductor
## scales 1.1.1 2020-05-11 [1] CRAN (R 4.1.2)
## sessioninfo 1.2.2 2021-12-06 [1] CRAN (R 4.1.2)
## SingleCellExperiment 1.16.0 2021-10-26 [1] Bioconductor
## singscore * 1.14.0 2021-10-26 [1] Bioconductor
## sparseMatrixStats 1.6.0 2021-10-26 [1] Bioconductor
## stringi 1.7.6 2021-11-29 [1] CRAN (R 4.1.2)
## stringr 1.4.0 2019-02-10 [1] CRAN (R 4.1.2)
## SummarizedExperiment 1.24.0 2021-10-26 [1] Bioconductor
## svglite 2.1.0 2022-02-03 [1] CRAN (R 4.1.2)
## systemfonts 1.0.4 2022-02-11 [1] CRAN (R 4.1.2)
## tibble 3.1.6 2021-11-07 [1] CRAN (R 4.1.2)
## tidyr 1.2.0 2022-02-01 [1] CRAN (R 4.1.2)
## tidyselect 1.1.2 2022-02-21 [1] CRAN (R 4.1.2)
## utf8 1.2.2 2021-07-24 [1] CRAN (R 4.1.2)
## vctrs 0.3.8 2021-04-29 [1] CRAN (R 4.1.2)
## vipor 0.4.5 2017-03-22 [1] CRAN (R 4.1.2)
## viridisLite 0.4.0 2021-04-13 [1] CRAN (R 4.1.2)
## webshot 0.5.2 2019-11-22 [1] CRAN (R 4.1.2)
## withr 2.4.3 2021-11-30 [1] CRAN (R 4.1.2)
## xfun 0.29 2021-12-14 [1] CRAN (R 4.1.2)
## XML 3.99-0.8 2021-09-17 [1] CRAN (R 4.1.2)
## xml2 1.3.3 2021-11-30 [1] CRAN (R 4.1.2)
## xtable 1.8-4 2019-04-21 [1] CRAN (R 4.1.2)
## XVector 0.34.0 2021-10-26 [1] Bioconductor
## yaml 2.3.5 2022-02-21 [1] CRAN (R 4.1.2)
## zlibbioc 1.40.0 2021-10-26 [1] Bioconductor
##
## [1] /home/andrea/R/x86_64-pc-linux-gnu-library/4.1
## [2] /usr/local/lib/R/site-library
## [3] /usr/lib/R/site-library
## [4] /usr/lib/R/library
##

```

## References

- Ayers M, Lunceford J, Nebozhyn M, et al (2017) IFN- $\gamma$ -related mRNA profile predicts clinical response to PD-1 blockade. *Journal of Clinical Investigation* 127:2930–2940. <https://doi.org/10.1172/jci91190>
- Bai S, Yan Y-B, Chen W, et al (2019) Bioinformatic analysis reveals an immune/inflammatory-related risk signature for oral cavity squamous cell carcinoma. *Journal of Oncology* 2019:1–10. <https://doi.org/10.1155/2019/3865279>
- Charoentong P, Finotello F, Angelova M, et al (2017) Pan-cancer immunogenomic analyses reveal genotype-immunophenotype relationships and predictors of response to checkpoint blockade. *Cell Rep* 18:248–262. <https://doi.org/10.1016/j.celrep.2016.12.019>
- Chibon F, Lagarde P, Salas S, et al (2010) Validated prediction of clinical outcome in sarcomas and multiple types of cancer on the basis of a gene expression signature related to genome complexity. *Nat Med* 16:781–787. <https://doi.org/10.1038/nm.2174>
- De Cecco L, Bossi P, Locati L, et al (2014) Comprehensive gene expression meta-analysis of head and neck squamous cell carcinoma microarray data defines a robust survival predictor. *Ann Oncol* 25:1628–1635. <https://doi.org/10.1093/annonc/mdu173>
- Eschrich SA, Pramana J, Zhang H, et al (2009) A gene expression model of intrinsic tumor radiosensitivity: Prediction of response and prognosis after chemoradiation. *International Journal of Radiation Oncology Biology Physics* 75:489–496. <https://doi.org/10.1016/j.ijrobp.2009.06.014>
- Eustace A, Mani N, Span PN, et al (2013) A 26-gene hypoxia signature predicts benefit from hypoxia-modifying therapy in laryngeal cancer but not bladder cancer. *Clinical Cancer Research* 19:4879–4888. <https://doi.org/10.1158/1078-0432.ccr-13-0542>
- Fang R, Iqbal M, Chen L, et al (2021) A novel comprehensive immune-related gene signature as a promising survival predictor for the patients with head and neck squamous cell carcinoma. *Aging* 13:11507–11527. <https://doi.org/10.18632/aging.202842>
- Foroutan M, Bhuvu DD, Lyu R, et al (2018) Single sample scoring of molecular phenotypes. *BMC bioinformatics* 19: <https://doi.org/10.1186/s12859-018-2435-4>
- Hänzelmann S, Castelo R, Guinney J (2013) GSVA: Gene set variation analysis for microarray and RNA-seq data. *BMC bioinformatics* 14: <https://doi.org/10.1186/1471-2105-14-7>
- Hester J, Vaughan D (2021) Bench: High precision timing of r expressions
- Hu G, Jiang Q, Liu L, et al (2021) Integrated analysis of RNA-binding proteins associated with the prognosis and immunosuppression in squamous cell carcinoma of head and neck. *Frontiers in Genetics* 11: <https://doi.org/10.3389/fgene.2020.571403>
- Huber W, Carey VJ, Gentleman R, et al (2015) Orchestrating high-throughput genomic analysis with bioconductor. *Nature Methods* 12:115–121. <https://doi.org/10.1038/nmeth.3252>
- Li C-W, Shi X, Ma B, et al (2021) A 4 gene-based immune signature predicts dedifferentiation and immune exhaustion in thyroid cancer. *The Journal of Clinical Endocrinology & Metabolism* 106:e3208–e3220. <https://doi.org/10.1210/clinem/dgab132>
- Liberzon A, Birger C, Thorvaldsdóttir H, et al (2015) The molecular signatures database hallmark gene set collection. *Cell Syst* 1:417–425. <https://doi.org/10.1016/j.cels.2015.12.004>
- Liu X, Chen J, Lu W, et al (2020) Systematic profiling of immune risk model to predict survival and immunotherapy response in head and neck squamous cell carcinoma. *Frontiers in Genetics* 11: <https://doi.org/10.3389/fgene.2020.576566>
- Liu Z, Zhang D, Liu C, et al (2021) Comprehensive analysis of myeloid signature genes in head and neck squamous cell carcinoma to predict the prognosis and immune infiltration. *Frontiers in Immunology* 12: <https://doi.org/10.3389/fimmu.2021.659184>
- Lohavanichbutr P, Méndez E, Holsinger FC, et al (2013) A 13-gene signature prognostic of HPV-negative OSCC: Discovery and external validation. *Clinical Cancer Research* 19:1197–1203. <https://doi.org/10.1158/1078-0432.ccr-12-2647>
- Muro K, Chung HC, Shankaran V, et al (2016) Pembrolizumab for patients with PD-L1-positive advanced gastric cancer (KEYNOTE-012): A multicentre, open-label, phase 1b trial. *The Lancet Oncology* 17:717–

726. [https://doi.org/10.1016/s1470-2045\(16\)00175-3](https://doi.org/10.1016/s1470-2045(16)00175-3)
- Qiang W, Dai Y, Xing X, Sun X (2021) Identification and validation of a prognostic signature and combination drug therapy for immunotherapy of head and neck squamous cell carcinoma. *Computational and Structural Biotechnology Journal* 19:1263–1276. <https://doi.org/10.1016/j.csbj.2021.01.046>
- Rooney MS, Shukla SA, Wu CJ, et al (2015) Molecular and genetic properties of tumors associated with local immune cytolytic activity. *Cell* 160:48–61. <https://doi.org/10.1016/j.cell.2014.12.033>
- She Y, Kong X, Ge Y, et al (2020) Immune-related gene signature for predicting the prognosis of head and neck squamous cell carcinoma. *Cancer Cell International* 20: <https://doi.org/10.1186/s12935-020-1104-7>
- Wickham H, Averick M, Bryan J, et al (2019) Welcome to the tidyverse. *JOSS* 4:1686. <https://doi.org/10.21105/joss.01686>
- Wu Z-H, Tang Y, Zhou Y (2020) A metabolic gene signature to predict overall survival in head and neck squamous cell carcinoma. *Mediators of Inflammation* 2020:1–12. <https://doi.org/10.1155/2020/6716908>
- Xie Y, Allaire JJ, Grolemond G (2018) *R markdown: The definitive guide*. Chapman; Hall/CRC, Boca Raton, Florida
- Yoshihara K, Shahmoradgoli M, Martínez E, et al (2013) Inferring tumour purity and stromal and immune cell admixture from expression data. *Nat Commun* 4: <https://doi.org/10.1038/ncomms3612>
